# Supplementary material for: Connecting shear localization with the long-range correlated polarized stress fields in granular materials
Source: PubMed Central journal article supplement (PMC7455740; doi:10.1038/s41467-020-18217-x), 2020-08-28
Supplement: 41467_2020_18217_MOESM1_ESM.pdf [file 41467_2020_18217_MOESM1_ESM.pdf]

Supplementary Information: Connecting shear  
localization with the long-range correlated  
polarized stress fields in granular materials

Wang et al.

# Supplementary Figures

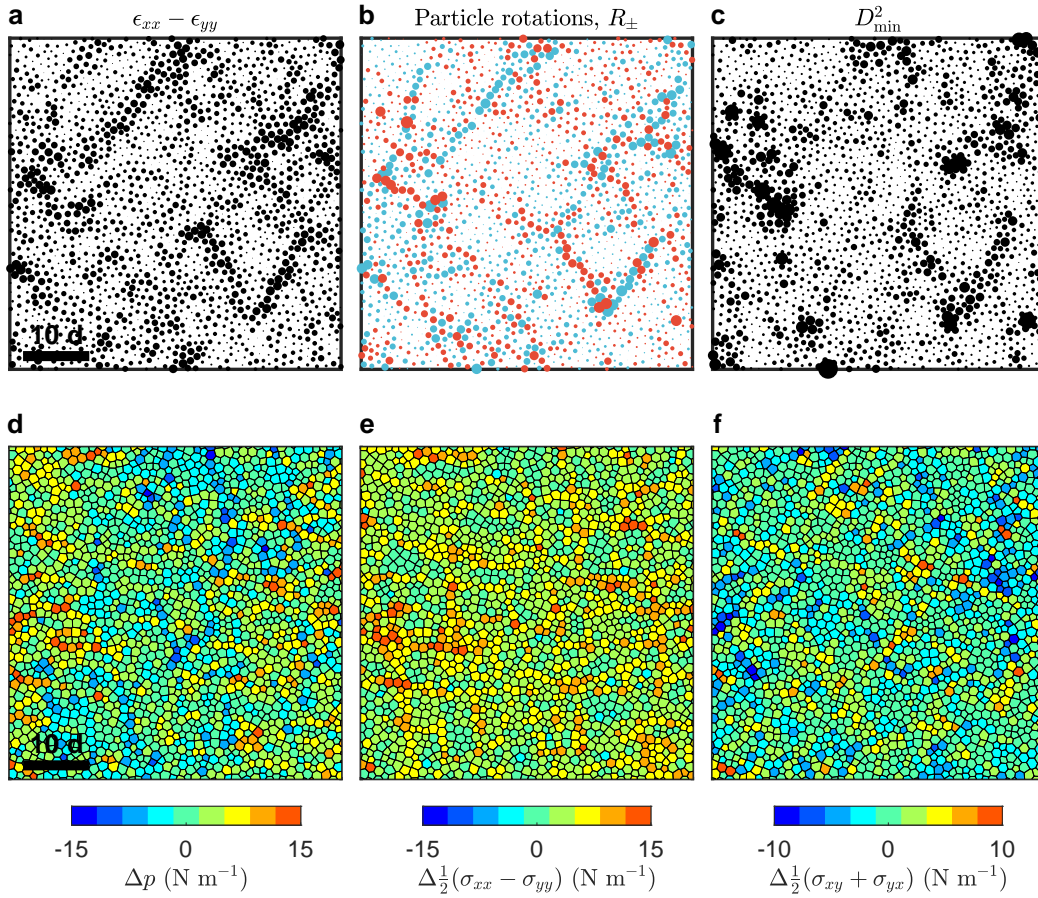

## Supplementary Figure 1. Shear localization and particle-scale stress changes.

Spatial distributions of **a**, local shear strain  $\epsilon_{xx} - \epsilon_{yy}$ , **b**, particles rotations (blue circles indicate clockwise rotations, red circles indicate counterclockwise rotations) and **c**,  $D_{\min}^2$ . Spatial distributions of particle-scale stress changes for three components **d**,  $p = \frac{1}{2}(\sigma_{xx} + \sigma_{yy})$ , **e**,  $\frac{1}{2}(\sigma_{xx} - \sigma_{yy})$ , **f**,  $\frac{1}{2}(\sigma_{xy} + \sigma_{yx})$ . All of these quantities are measured from  $\gamma = 0\%$  to  $\gamma = 0.75\%$ , the same as those in main text. Scale bar = 10 d, where d is the diameter of small particle.

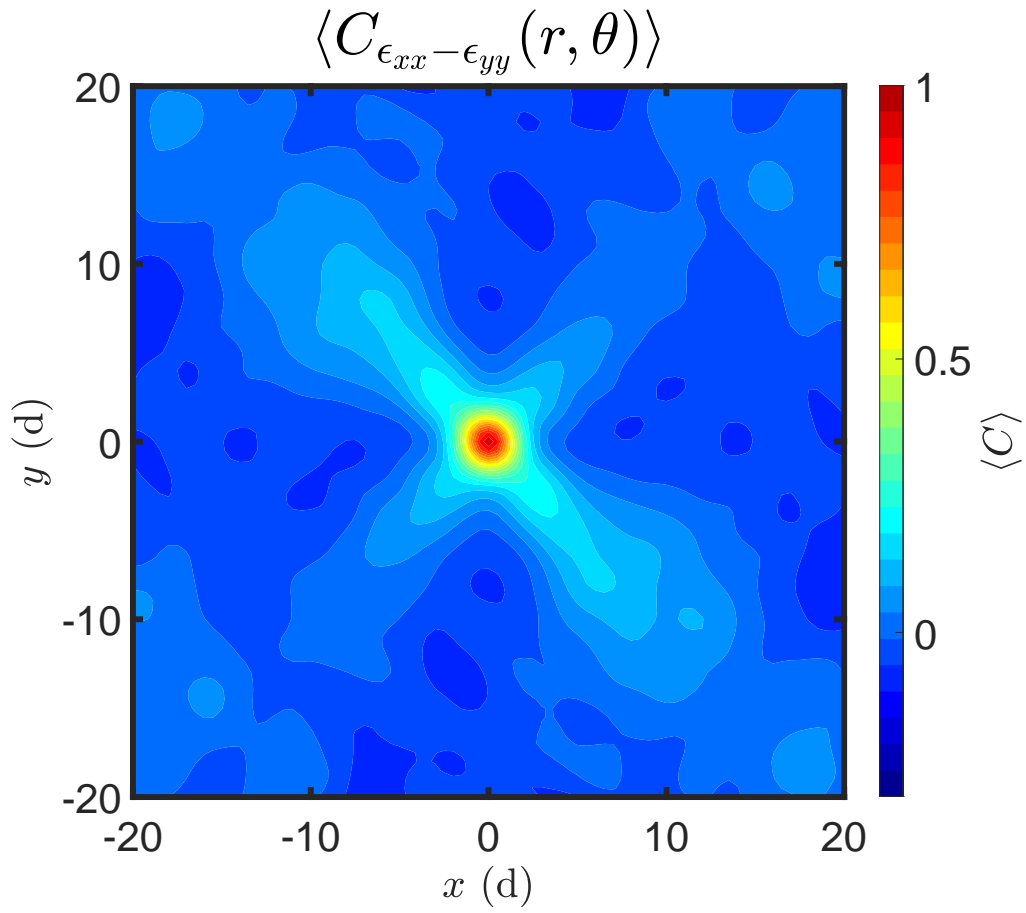

**Supplementary Figure 2. Autocorrelation map of local shear strain  $\epsilon_{xx} - \epsilon_{yy}$ .** The local shear strain is measured from  $\gamma = 0\%$  to  $\gamma = 0.75\%$ . The map is averaged over six independent runs.  $\langle C \rangle$  denotes the correlation function.

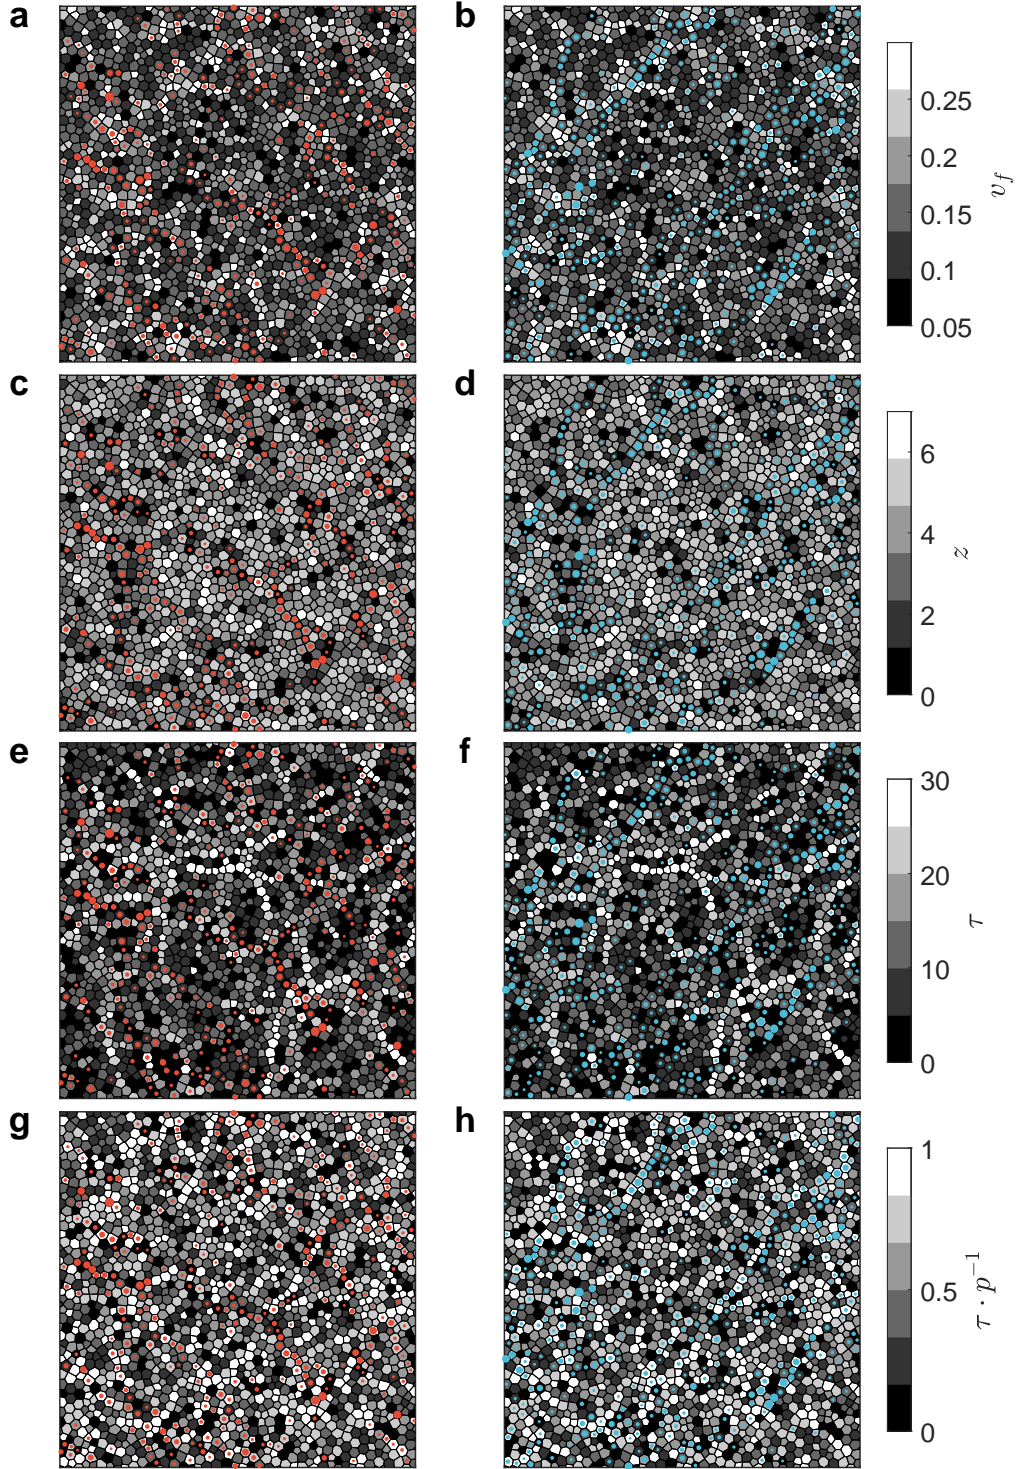

**Supplementary Figure 3. Correlations between particle rotations and other quantities.** **a**, For counterclockwise rotations  $R_+$  and free volume  $v_f = (S_i - \pi r_i^2) \cdot (\pi r_i^2)^{-1}$ ,  $S_i$  is the voronoi area of disk  $i$  and  $r_i$  is its radius.  $C(v_f, R_+) = -0.34$ . **b**, For clockwise rotations  $R_-$  and  $v_f$ .  $C(v_f, R_-) = -0.19$ . **c**, For  $R_+$  and contact number  $z$ .  $C(z, R_+) = 0.15$ . **d**, For  $R_-$  and  $z$ .  $C(z, R_-) = 0.15$ . **e**, For  $R_+$  and deviatoric shear stress  $\tau$  (one half of the difference between two eigenvalues of a stress tensor).  $C(\tau, R_+) = 0.08$ . **f**, For  $R_-$  and  $\tau$ .  $C(\tau, R_-) = 0.16$ . **g**, For  $R_+$  and the ratio of the deviatoric shear stress over pressure  $\tau \cdot p^{-1}$ .  $C(\tau \cdot p^{-1}, R_+) = -0.15$ . **h**, For  $R_-$  and  $\tau \cdot p^{-1}$ .  $C(\tau \cdot p^{-1}, R_-) = -0.13$ .

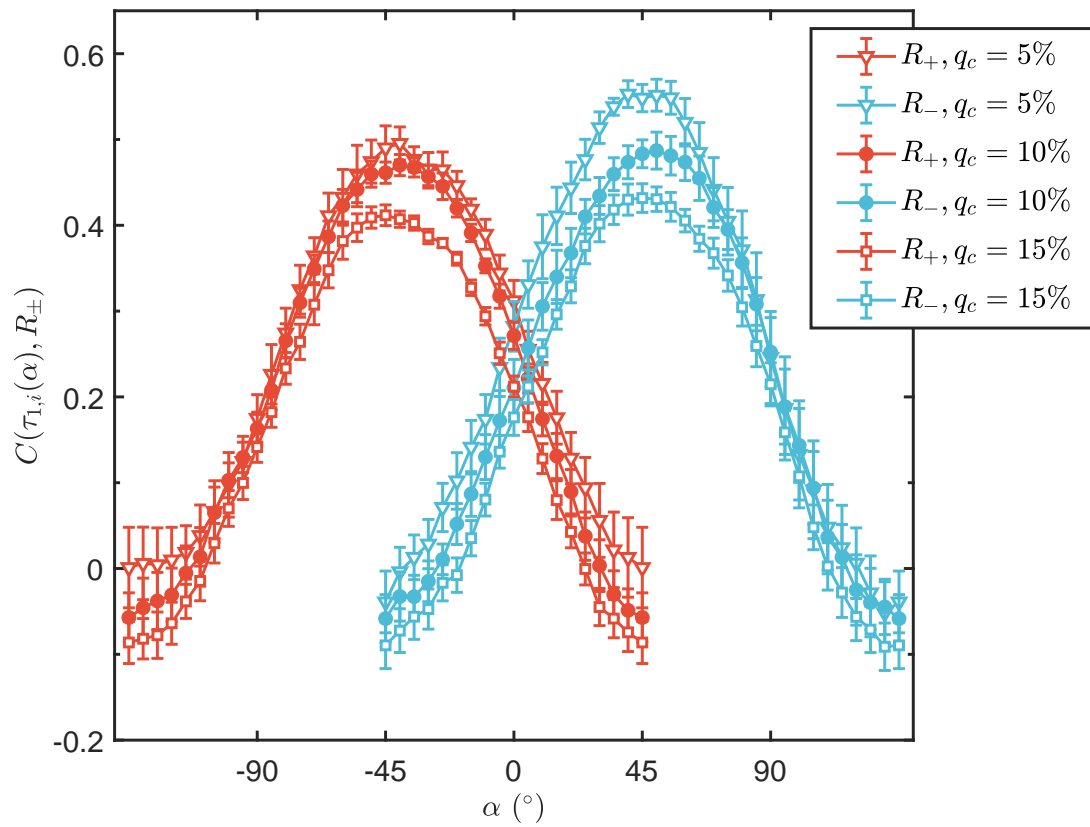

Supplementary Figure 4. Correlations between particle rotations and  $\tau_{1,i}(\alpha)$  versus angle  $\alpha$ , for different cutoffs  $q_c$  of particle rotations.

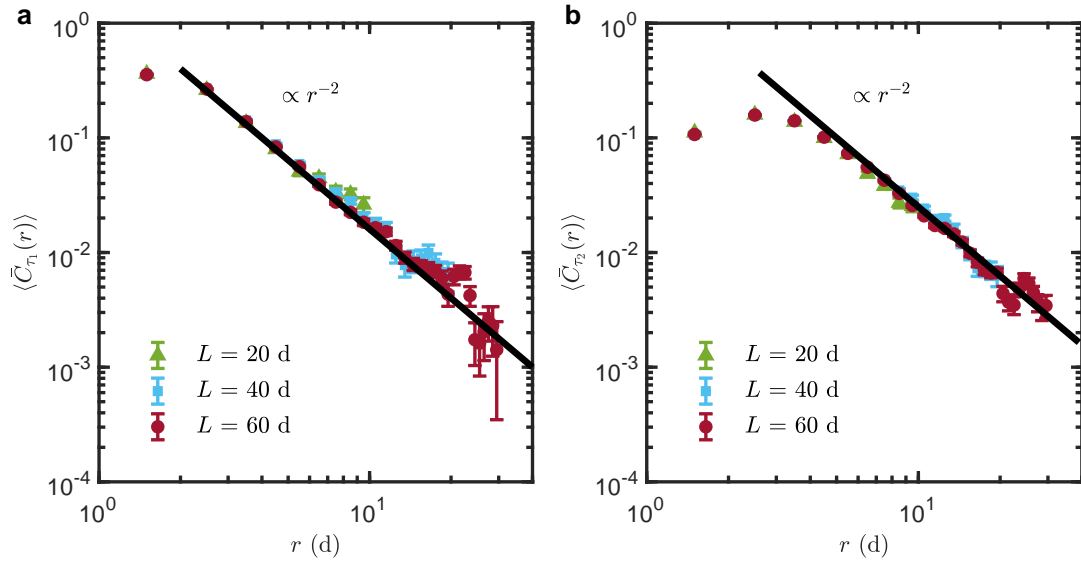

**Supplementary Figure 5. Finite size analyses of stress correlation functions.** Finite size analyses of angle-averaged correlation functions **a**,  $\langle \bar{C}_{\tau_1}(r) \rangle = \pi^{-1} \int_0^{2\pi} d\theta \cos(2\theta) \langle C_{\tau_1}(r, \theta) \rangle$  and **b**,  $\langle \bar{C}_{\tau_2}(r) \rangle = \pi^{-1} \int_0^{2\pi} d\theta \cos(4\theta) \langle C_{\tau_2}(r, \theta) \rangle$ , for system sizes of  $L = 20$  d, 40 d and 60 d. The black lines indicate a power law of  $r^{-2}$ , as a guide to the eye.
